# Supplementary material for: The structure of the cyanobactin domain of unknown function from PatG in the patellamide gene cluster
Source: PubMed Central journal article supplement (PMC4259220; doi:10.1107/s2053230x1402425x), 2014-11-14
Supplement: f-70-01597-sup1.pdf [file f-70-01597-sup1.pdf]

|          |                                                                                           |     |
|----------|-------------------------------------------------------------------------------------------|-----|
| PatA-DUF | APSELANS . QFAYV LGT LGYDFGTEARRDTFKQLMPPFDFA G . NMVPA                                   | 462 |
| TruA-DUF | APSELANS . QFAYV LGT LGYDFGTEARRDTFKQLMPPFDFA G . NMVPA                                   | 431 |
| ArtA-DUF | APSELASS . QL VYALGT LGYDFGSEARRDTFKQLMPPFEI SEGVSVPA                                     | 404 |
| LynA-DUF | APSELADMGQLVYALGT LGYDFGTEARRDSFKQLMPPFDLGGGVMVPA                                         | 424 |
| MicA-DUF | APSQIADLGQI VYV LGT LGYDFGTEARRDSFKQLMPPFDLGGGIMVPA                                       | 417 |
| TenA-DUF | APSELPLD LGPLVYS LGT LGYDFGTEARRDSFKQLMPPFDI GGGVMVPA                                     | 423 |
| AcyA-DUF | APSDLAQV . NLVYALGT LGYDFGSEARRDSFKQLMPPGVQIDG . TAI PA                                   | 418 |
| PagA-DUF | APSEL E GK . NLVYALGV LGYDFGSEARRDSFKQLMPPGVSI EG . TMI PA                                | 415 |
| PatA-DUF | NPYDARQMVDY LGNNISEARS LIWTVNIELTPVYAI DPTGPFASSTYH                                       | 510 |
| TruA-DUF | NPYDARQMVDY LGNNISEARS LIWTVNIELTPVYAI DPTGPFASSTYH                                       | 479 |
| ArtA-DUF | NPYDARQMVDY L ASDI SEARS LIWTVNIELTPVYAI EPKGGPFAREAYL                                    | 452 |
| LynA-DUF | NPYDARQMVDY LG ENISESRS LIWTVNIELTPVYAI DPTGPFAAEA YR                                     | 472 |
| MicA-DUF | NPYDARQMVDY LG ENISESRS LIWTVNIELTPVYAI APTGPFASDVYR                                      | 465 |
| TenA-DUF | NPYDARQMVDY LD ANISEARS LIWTVNIELTPVYAI DPTGPFAAESYR                                      | 471 |
| AcyA-DUF | NPYDARQMVDY LGDNLS EAKSLIWTVNLELTPVYAI EP TGGFAARDVYA                                     | 466 |
| PagA-DUF | NPYDARQMVDY LG ENLP EAKALIWTVNLELTP IYAI EPVGGF SRDVYE                                    | 463 |
| PatA-DUF | ALQELLSGQIQAE DNEEYVERVS IPGVLTNR SVKLFSGQVVPVVEPQS                                       | 558 |
| TruA-DUF | ALQELLSGQIQAE DNEEYVERVS IPGVLTNR SVKLFSGQVVPVVEPQS                                       | 527 |
| ArtA-DUF | ALQELLSGQIQAE DDDYIERVS IPGVLTGR TVKLFSGQVVP IIEPQS                                       | 500 |
| LynA-DUF | ALQELLSGQIQAE DTEYVERVS IPGILTG RKVKLFSGQV IPVIEPQS                                       | 520 |
| MicA-DUF | ALQELLSGQIQAE SDAEYMERVS IPGVLTG KVKLFSGQV IPVIEPLG                                       | 513 |
| TenA-DUF | ALHELSSGQIQAE SDAEYMERVS IPGILTK RTVKLYSGQV IPVLEPQS                                      | 519 |
| AcyA-DUF | ILQQLLSGQIQAE DSEN YVERVS IPGILS GR SVKLFSGQVVPVIEV PN                                    | 514 |
| PagA-DUF | V LQGLLSGQIQAE ENSPE FVQRVS IPGVLTGR SVKLFSGQVVPVIE I NN                                  | 511 |
| PatA-DUF | TRGLYGWKVNG LVNAALEAVR AEGGDAGEAR IRQTL DGF LNRIYD LR                                     | 606 |
| TruA-DUF | TRGLYGWKVNG LVNAALEAVR AEGGDAGEAR IRQTL DGF LNRIYD LR                                     | 575 |
| ArtA-DUF | TRGLYGWKVNS LVNAALF ETVQA AEGEADRDAM SR T LGS FLNRVYD LR                                  | 548 |
| LynA-DUF | TRGLYGWKVNS LVSAAMDAVQA EDGAADEET IRKTL DGF LNRIYD LR                                     | 568 |
| MicA-DUF | TRGIYGWKVNS LVNAAMEAVQA EDGT ADEEDR IRKTL DGF LNRIYD LR                                   | 561 |
| TenA-DUF | TRGIYGWKVNS LVSAAMAAVQA EA GA ADEET IRKTL DGF LNRIYD LR                                   | 567 |
| AcyA-DUF | TRGLYGWKVNT LVQAAI QT VQA QATEAQEES IRRT LGS FL SR IYD LR                                 | 562 |
| PagA-DUF | TRGLYGWKVNS LVSAAI ES VQSEAGDA QEDA IRRT LSS FLNR IYD LR                                  | 559 |
| PatA-DUF | NLGTTSQDRALNF AVTNAFQAAQTFSQSVA A GMELDSVTVEKSPFCRL                                       | 654 |
| TruA-DUF | NLGTTSQDRALNF AVTNAFQAAQTFSQSVA A GMELDSVTVEKSPFCRL                                       | 623 |
| ArtA-DUF | NLGTTSQDRALNF SVTNAFQAAQTFSQAVAVQ GMELDSITVEKSPFCRM                                       | 596 |
| LynA-DUF | NLGTTSQDRALNFS VTNAFQAAQTFSQAVAV GMELDSVTVEKSPFCRM                                        | 616 |
| MicA-DUF | NLGTTSQDRALNF AVTNAFQAAQTFSQAVAV GMELDSVTVEKSPFCRI                                        | 609 |
| TenA-DUF | NLGM T SQDRALNF AVTNAFQAAQTFS EAVAV GMELDSVTVEKSPFCRM                                     | 615 |
| AcyA-DUF | NLGTTSQDRALNF ASTNAFQAAQT FAEAVAT GMELDSITVEKSPFCRL                                       | 610 |
| PagA-DUF | NLGTTSQDRALNF AS TNAFQAAQT F AQAVGA GY ELDSITVEKSPFCRL                                    | 607 |
| PatA-DUF | DSDCWDIKLKFFDPEN N RRAKKIYRFT IDVSD LVPVTMGEVRSWSS .                                      | 700 |
| TruA-DUF | DSDCWDIKLKFFDPEN N RRAKKIYRFT IDVSD LVPVTMGEVRSWSS SY                                     | 671 |
| ArtA-DUF | DSDCWDV K L K F F D P E N S R R A K K I F R F T I D V S D L I P V T L G E V R S W S S P Y | 644 |
| LynA-DUF | DSDCWDV K L K F F D P E N S R R A K K I Y R F T I D V S D L I P V T L G E V R S W S S P Y | 664 |
| MicA-DUF | DSDCWDV K L K F F D P E N S R R A K K I F R F T I D V S D L I P V T L G E V R S W S S P Y | 657 |
| TenA-DUF | DSDCWDV K L K F F D P E N N R R A K K I F R F T I D V S D L I P V T L G E V R S W S S P Y | 663 |
| AcyA-DUF | DSDCWDV K L K F F D P E N S R R A K K L F R F T I D V S D I I P V T L G E V R S W S T P Y | 658 |
| PagA-DUF | DSDCWDV K L K F F D P E N S R R A K K I Y R F T I D V S D T I P V T L G E V R S W S S A Y | 655 |

**Fig. S1A** Sequence alignment between PatA-DUF and homologues from related cyanobactin biosynthetic pathways. Residues involved in  $Zn^{2+}$  coordination (as identified in the PatG-DUF<sub>sp.</sub> structure) are highlighted with red triangles.

|                         |                                                         |      |
|-------------------------|---------------------------------------------------------|------|
| PatG-DUF <sub>sp.</sub> | VEASTAFSGNVYALGTIGYDFGDEARRDRTFKERMA.....DPP            | 950  |
| TruG-DUF                | VEASTAFSGNVYALGTIGYDFGDEARRLNTFKERTMAPVNLHGVMVPPDPP     | 761  |
| ArtG-DUF                | VQPSKAGSGHVYALGTIGYDFGDEARRDRTFKERTMAPVNLHGVMVPPDPP     | 1051 |
| LynG-DUF                | VEASTAFSGHVYALGTIGYDFGDETRVDTFKERMAPVEMDSSLVLPDPP       | 1053 |
| MicG-DUF                | VEASTAFSGHVYALGTLSYDFGDETCVDTFKERMAPVEMDSSLVLPDPP       | 1108 |
| TenG-DUF                | VEASTAYDGNVYALGTIGYDFGDETRRRDSFKELMPPTQVNGIMVSPDPP      | 1059 |
| AcyG-DUF                | .....SAAASKLVYALGTIGYDFGSEARRDSFKQLMPAVNEIDGITIPANP     | 471  |
| PagG-DUF                | .....ASAAASKLVYVYVLTIGYDFGSEARRDSFKQLMPAVNEIDGITIPANP   | 452  |
| PatG-DUF <sub>sp.</sub> | YDARQMVERLDRNPDEARS LIWT LNLEGDVIYALDLPKGP FATNVYEIF    | 998  |
| TruG-DUF                | YDARQMVEHLDRNPDEARS LIWT LNLEGDVIYALDLPKGP FATNVYEIF    | 809  |
| ArtG-DUF                | YDARQMVEHLDRNH PDAAYS LIWT LNLDQNTIYALDLPKGP FADDIYEMF  | 1099 |
| LynG-DUF                | YDPRQMVEHLDRNPDES RSLIWT LSLDGGDTIYVLEPTGAFSDQIYEMF     | 1101 |
| MicG-DUF                | YDPRQMVEHLDRNPDES RSLIWT LSLDGGDTIYVLEPTGAFSDQIYEMF     | 1156 |
| TenG-DUF                | YDVRQMVEHYLDRNPDES RSLIWT LSLDGGDTIYALDPTGAFSGQIYEIF    | 1107 |
| AcyG-DUF                | YDSQQMVNYLSENPAEAKPLIWT LNQE LTP IYALEP VSGFAAD IYETL   | 519  |
| PagG-DUF                | YDASQIVNYLAENSS ES KSLIWT INQE FNP VYALEV KGGFAAD VYEML | 500  |
| PatG-DUF <sub>sp.</sub> | LQMLAGQLEPETSADFIERLSVPARRRTTRTVELFSGGEVVPVNVVRDPRR     | 1046 |
| TruG-DUF                | LQMLAGQLEPETSADFIERLSVPARRRTTRTVELFSGGEVMPVNVVRDPRR     | 857  |
| ArtG-DUF                | LLMLNAGQLEPETSAEFMERVSIPGRQTNRTMVELFSGGEVVPVNVVRDPRR    | 1147 |
| LynG-DUF                | VLMLAGQLEPESSDEFVERISIPARRQTNRTVVELFSGGQVVPVVKVHDIRR    | 1149 |
| MicG-DUF                | VLMLVGGQLEQKSSDEFVERISIPARRQTNRTVVELFSGGQVVPVVKVHDIRR   | 1204 |
| TenG-DUF                | LLMLAGQLEPETSDEFVERISVPARRRTNRTVVELFSGGEVVPVNVVHDLRR    | 1155 |
| AcyG-DUF                | ILMLQGGIQPENSDDFVERVSIPARLTDRTVELFSGGQVVPVITLNTIR       | 567  |
| PagG-DUF                | NLMLAGQIEPESSDDYVERVSIPGQITDKTITL FSGGEVVPVITINNIR      | 548  |
| PatG-DUF <sub>sp.</sub> | GMYGWNVNA LVDAALAT.V...EYEEADEEDSLRQGLTAF LN RVY HDLHN  | 1091 |
| TruG-DUF                | GMYGWNVNA LVDAALAT.V...EYEEADEEDSLRQGLTAF LN RVY HDLHN  | 902  |
| ArtG-DUF                | GMYGWNINL LVDAALGT.LN.NLEEGSEGLLREGLTAF LN RVY YELHN    | 1193 |
| LynG-DUF                | GMYGWKVNT LVNAAMAA.IARQVDEAQAPLVQQALTAFLN RVY ND LRN    | 1196 |
| MicG-DUF                | GMYGWKVNT LVNAAMVA.ISRQVDEAQAPLIQQALTSFLN RVY ND LRN    | 1251 |
| TenG-DUF                | GLYGWKVNA LVDAAMAA.ISRQVDEAQAPLVRQALITSFLN RVY ND LRN   | 1202 |
| AcyG-DUF                | GMYGWKVNS LVDAALQTV.ITGETAPAQEIAMRKALSSFLN RVY YDLQN    | 615  |
| PagG-DUF                | GMYGWKVNG LVDAALQTLSEELADANEIQMRRLSSFLKRVYFDLQN         | 595  |
| PatG-DUF <sub>sp.</sub> | LGQTSRDRALNFTVTNTFQAASTFAQAIASGRQLDTEIENVNKSPYCRNLN     | 1139 |
| TruG-DUF                | LGQTSRDRALNFTVTNTFQAASTFAQAIASGRQLDTEIENVNKSPYCRNLN     | 950  |
| ArtG-DUF                | VGKTSRDRALNFVAVTNTFQAASATFAEAIADRRRLDTEI EVEKSPYCRNLN   | 1241 |
| LynG-DUF                | VGQTSRDRALNFVAATNIFQAASVFAKAI AERRQLDTEI KVEKSPFCRNLN   | 1244 |
| MicG-DUF                | VGQTSRDRALNFVAATNIFQAASVFAKAI AERRQLDTEI EVEKSPFCRNLN   | 1299 |
| TenG-DUF                | VGQTSRDRALNFVAATNIFQAASVFAKAI AERRQLDTEI KVEKSPFCRNLN   | 1250 |
| AcyG-DUF                | LGQLAKDRALNFSVTNAFQAASSFSQAISTGMQLDSIEVEKSPFCRNLN       | 663  |
| PagG-DUF                | LGKTSKDRALNFVAATNAFQAACSFAQAVS TGMELDTEIEI EKSPFCRVN    | 643  |
| PatG-DUF <sub>sp.</sub> | SDCWDVLLTFYDPEHGRRSRRVFRFTLDVVYVLPVTVGSIKSWSLPG         | 1186 |
| TruG-DUF                | SDCWDVLLTFYDPEHGRRSRRVFRFTLDVVYVLPVTVGSIKSWSLPG         | 997  |
| ArtG-DUF                | SDCWDVLLTFFDPEDEGKRSRQVFRFTLDVADSMPTVTVGSIKRWAIPG       | 1288 |
| LynG-DUF                | SDCWDVKLEFFDPESSRRGRKVFRLFTLDVV LQMPVTLGSEVKSWSLP.      | 1290 |
| MicG-DUF                | SDCWDIKLEFFSDPERSSRRGRKVFRLFTLDVV LQMPVTLGKIKSWSMPL.    | 1345 |
| TenG-DUF                | SDCWDVKLEFYDPENSRGRKVFRLFTLDVRL LMPVTLGSEVKSWSLP.       | 1296 |
| AcyG-DUF                | SDCWDVKLKKFFDPERNGRRAKKVFLFTLDVSDRIPVTLGQVRSWSV.        | 708  |
| PagG-DUF                | SDCWDVKLKKFFDPERGLRAKKVYLFSDVSYMIPVTLGQVRSWSVP.         | 689  |

**Fig. S1B** Sequence alignment between PatAG-DUF<sub>sp.</sub> and homologues from related cyanobactin biosynthetic pathways. Residues involved in Zn<sup>2+</sup> coordination (as identified in the PatG-DUF<sub>sp.</sub> structure) are highlighted with red triangles.

(a)

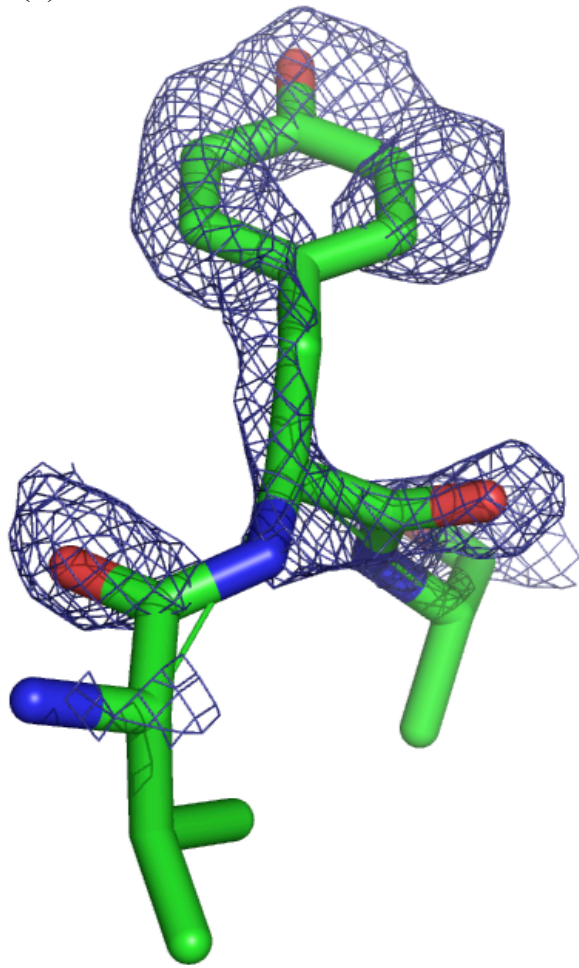

(b)

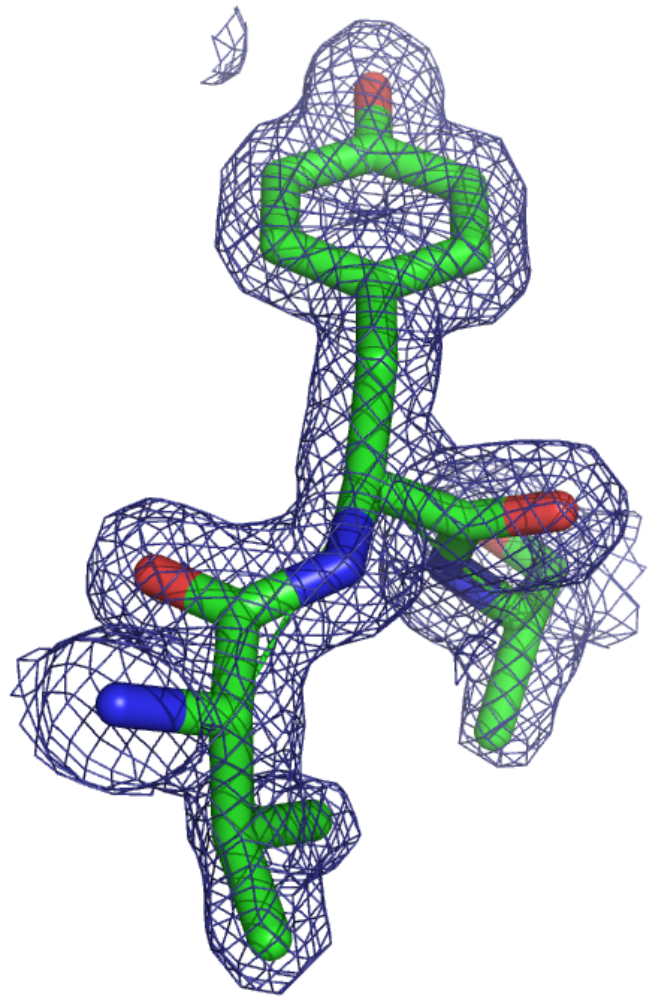

**Fig. S2** Final refined of PatG-DUF<sub>sp</sub> Y925 model with (a) Electron density map contoured at 1.2  $\sigma$  from PHENIX with experimental phases calculated from anomalous scattering atoms. (b) Electron density map calculated with phases after density PHENIX modification of experimental phases.

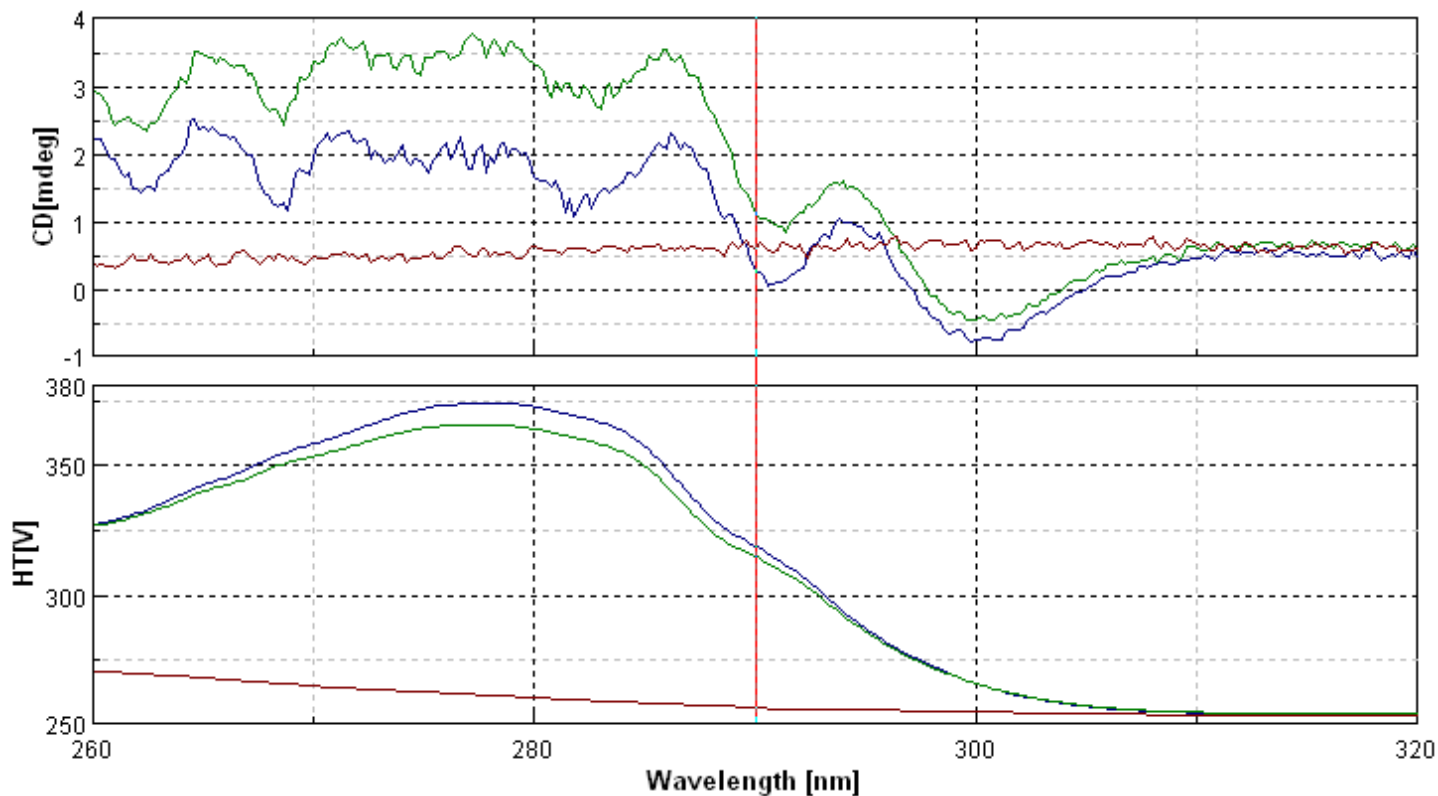

**Fig. S3** Near UV CD-spectra of PatG-DUF<sub>sp</sub> (green) and PatG-DUF<sub>di</sub> (blue). A blank containing only buffer is shown in red. The CD-spectra overlay well suggestion the sequence variations (three point mutations) do not alter the tertiary structure of the domain.

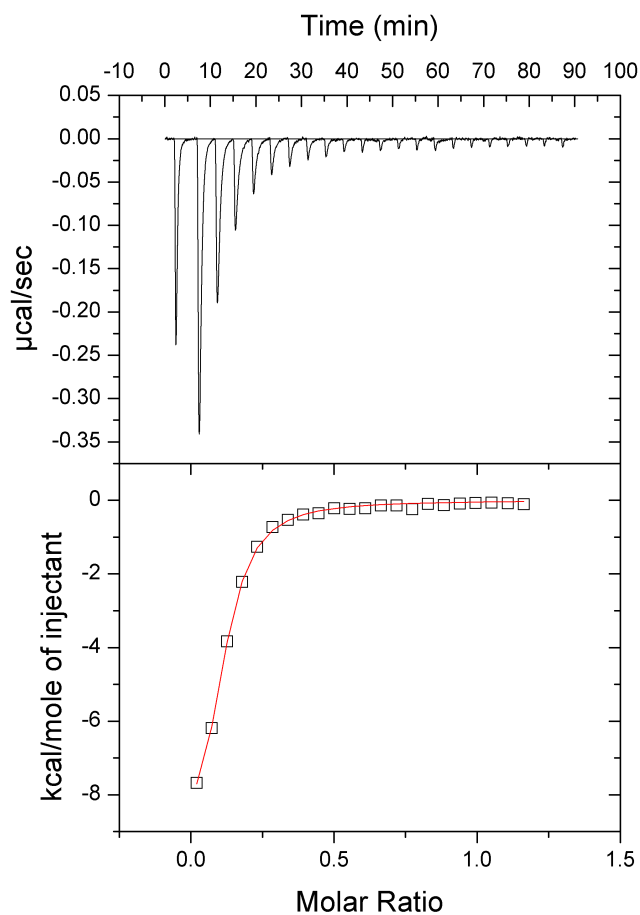

**Fig. S4** ITC data of PatE' titrated into PatG-DUF<sub>di</sub> solution. The top panel shows raw data representing the heat evolved in response to injections, the bottom panel shows the integrated heats of injections ( $\square$ ) and the best fit (-) to the one-site model (origin).

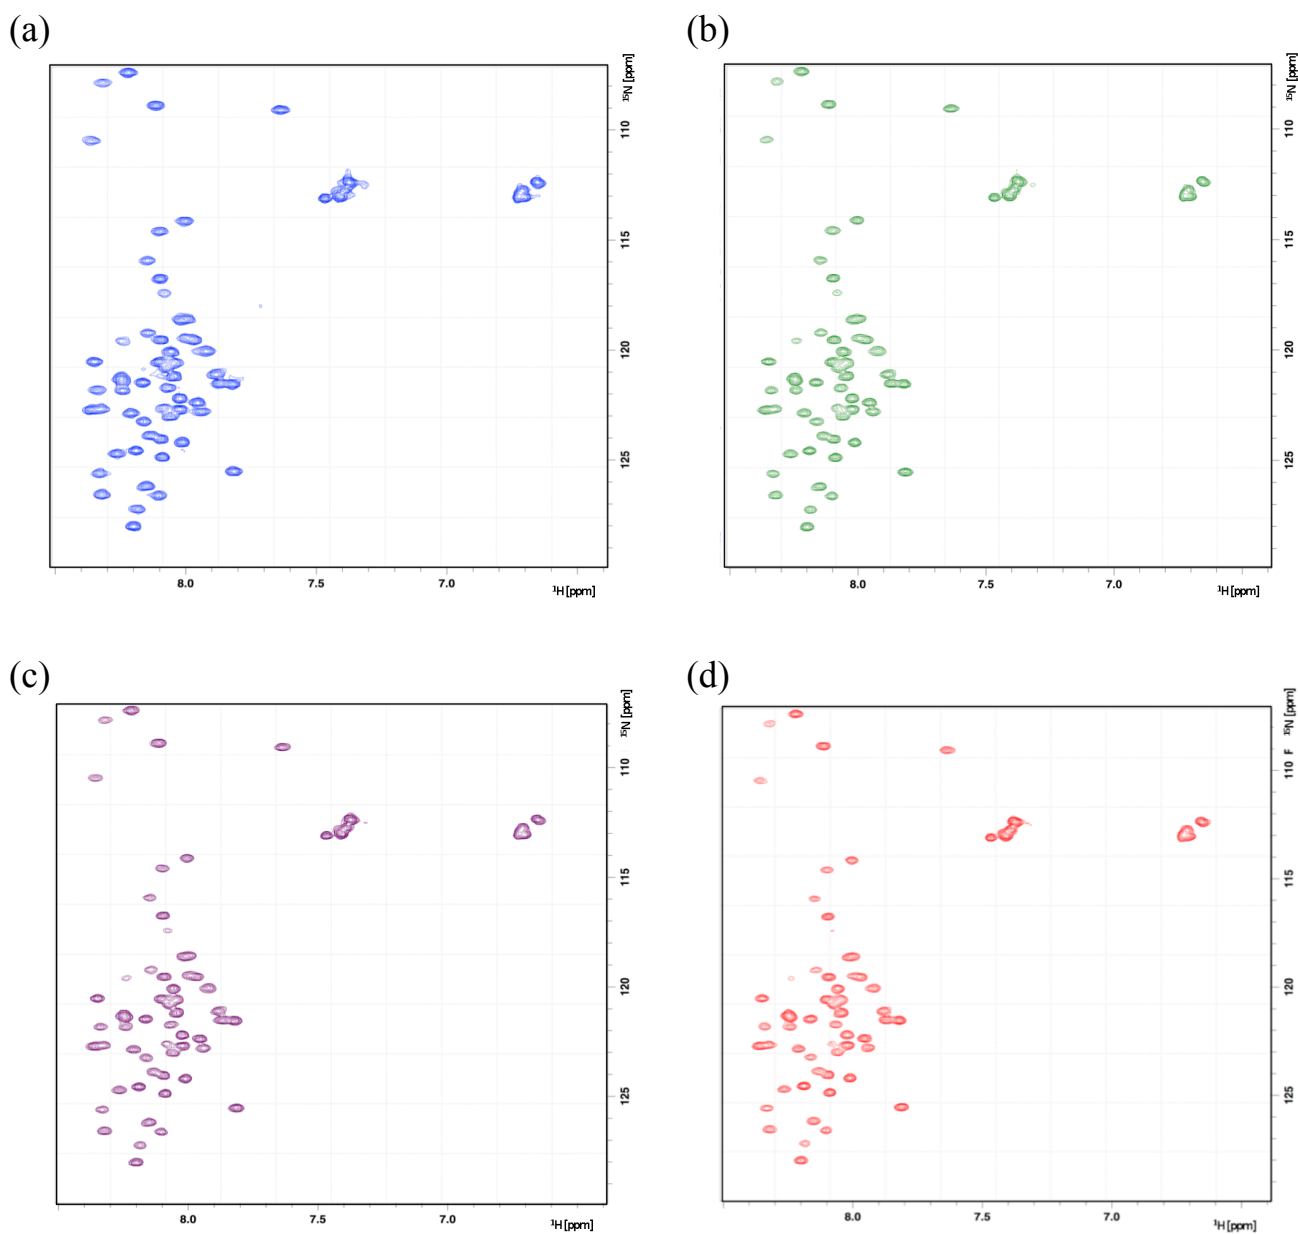

**Fig. S5A**  $^1\text{H}$ - $^{15}\text{N}$ -HSQC of  $\text{PatE}'$  (blue) with 0.5 (green), 1.0 (purple) and 2.0 (red) equivalence of  $\text{PatG-DUF}_{di}$ .



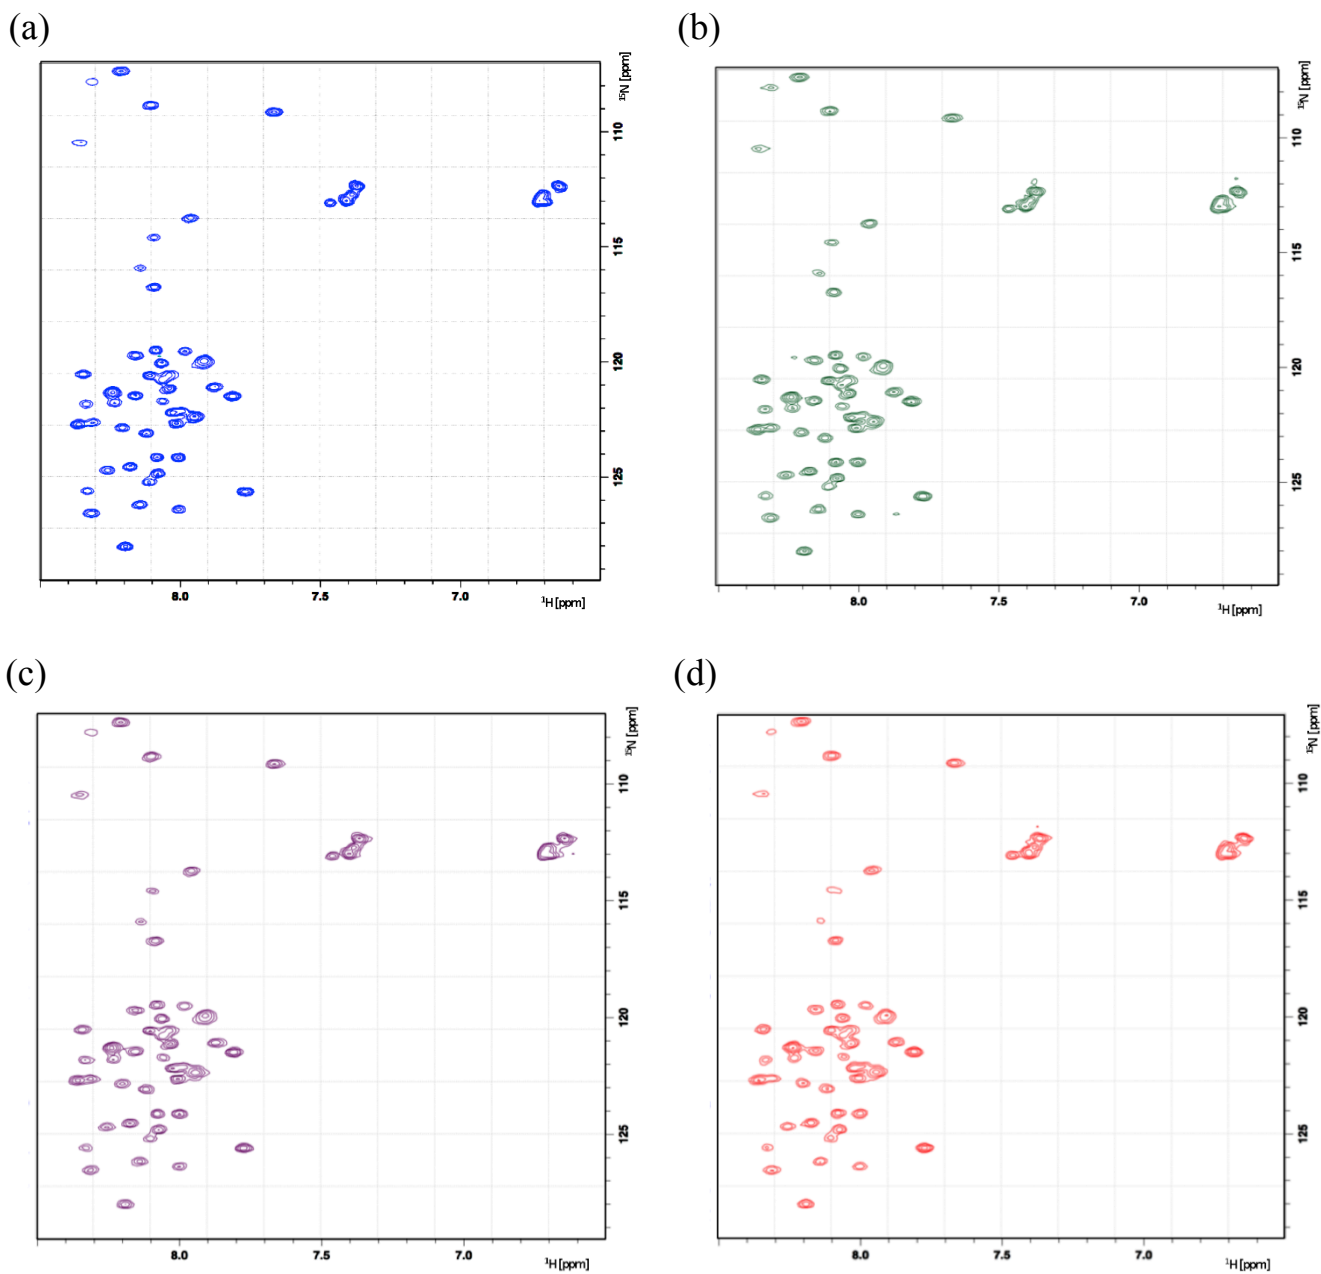

**Fig. S5B**  $^1\text{H}$ - $^{15}\text{N}$ -HSQC of heterocyclized-PatE' (blue) with 0.5 (green), 1.0 (purple) and 2.0 (red) equivalence of PatG-DUF $_{di}$ .
